# Supplementary material for: Deterministic Effects Propagation Networks for reconstructing protein signaling networks from multiple interventions
Source: Springer Nature journal article supplement (doi:10.1186/1471-2105-10-322), 2009-10-08

**n = 6**

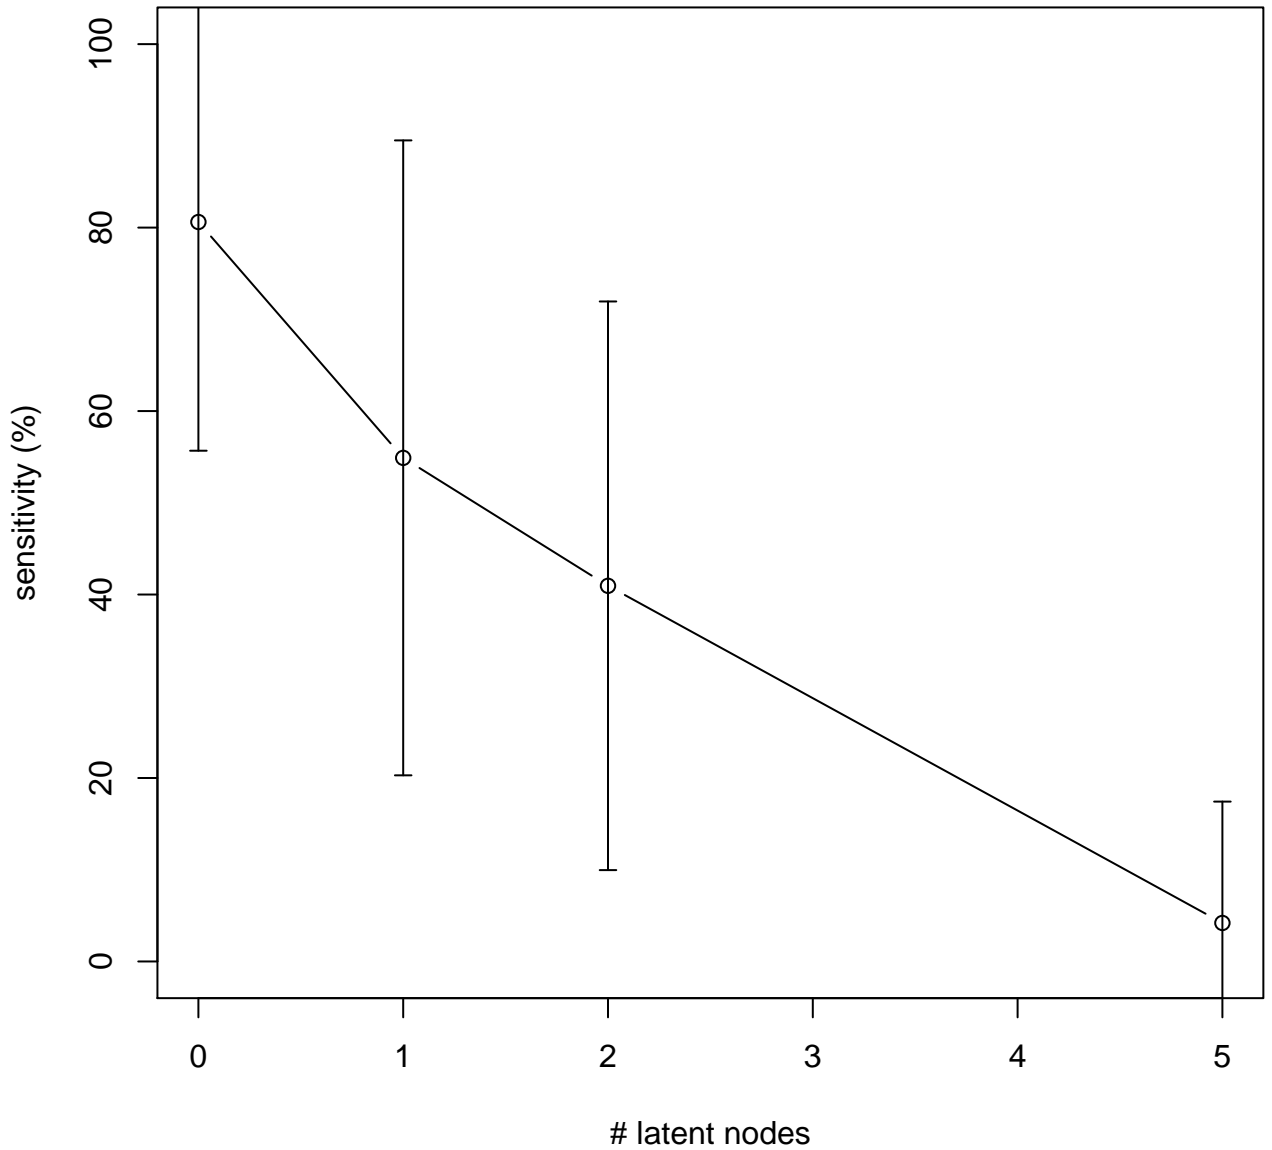

Supplement: 12859_2009_3052_MOESM14_ESM.pdf [file 12859_2009_3052_MOESM14_ESM.pdf]
